# Supplementary material for: What’s in a Name? Effect of Breed Perceptions & Labeling on Attractiveness, Adoptions & Length of Stay for Pit-Bull-Type Dogs
Source: PubMed Central journal article supplement (PMC4805246; doi:10.1371/journal.pone.0146857), 2016-03-23
Supplement: pone.0146857.s001.pdf [file pone.0146857.s001.pdf]

## **Supporting Information**

## **S1 Appendix A**

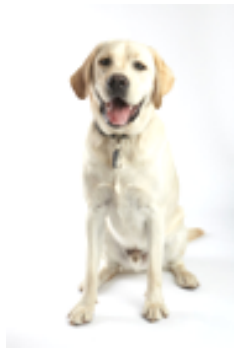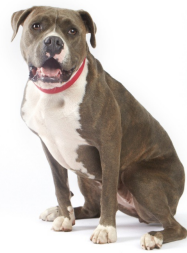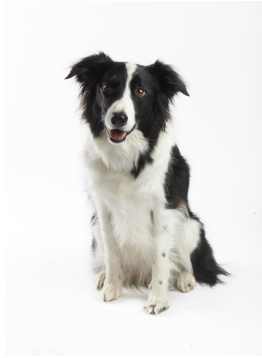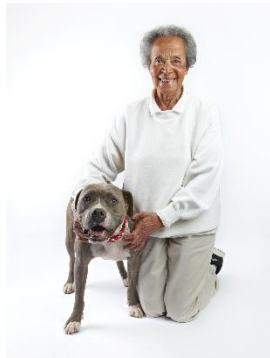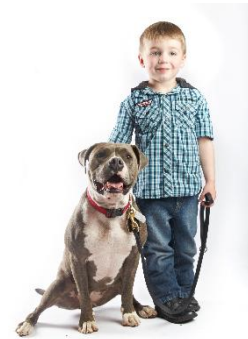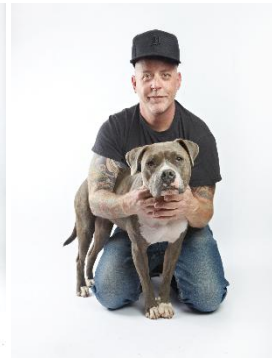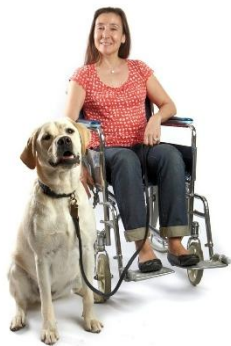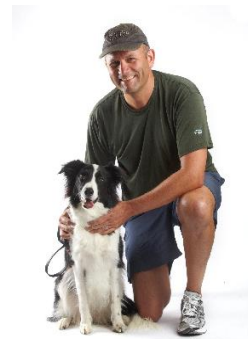

*SI Appendix A.* Images used in Study 1 with three dog breed exemplars, five dog and handler images – including three pit bull handler conditions with the elderly woman, male child and rough adult male.
