# Supplementary material for: What’s in a Name? Effect of Breed Perceptions & Labeling on Attractiveness, Adoptions & Length of Stay for Pit-Bull-Type Dogs
Source: PubMed Central journal article supplement (PMC4805246; doi:10.1371/journal.pone.0146857), 2016-03-23
Supplement: pone.0146857.s002.pdf [file pone.0146857.s002.pdf]

## **Supporting Information**

## S2 Appendix B

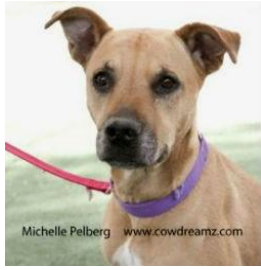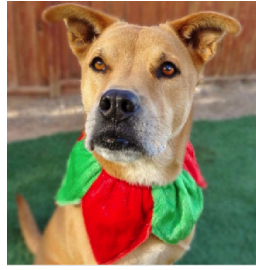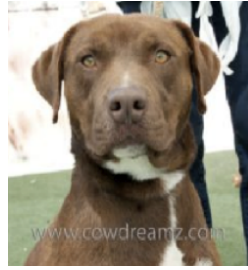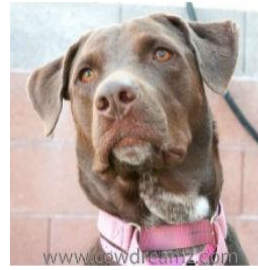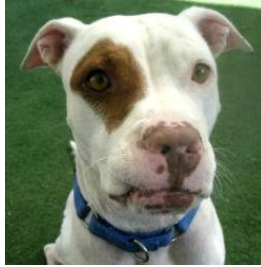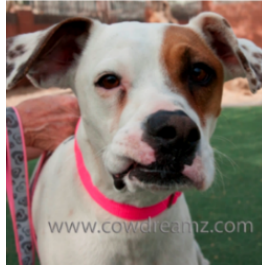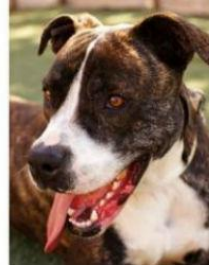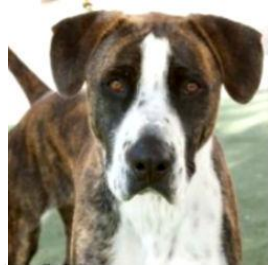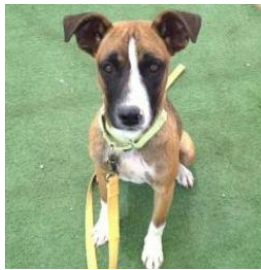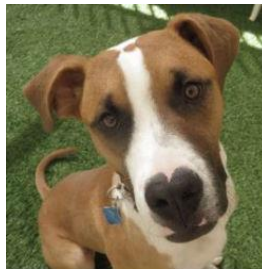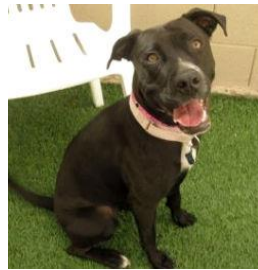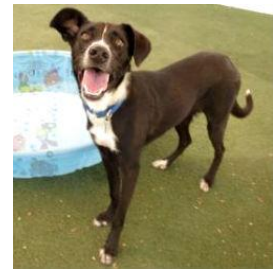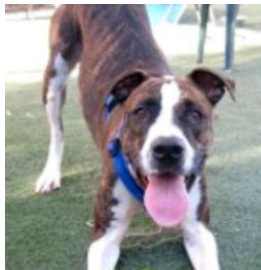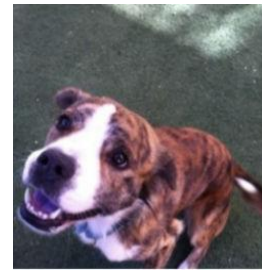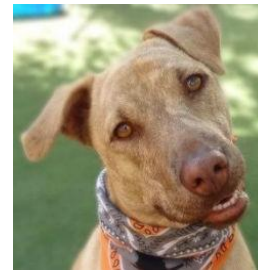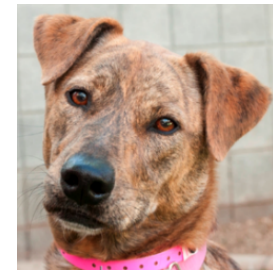

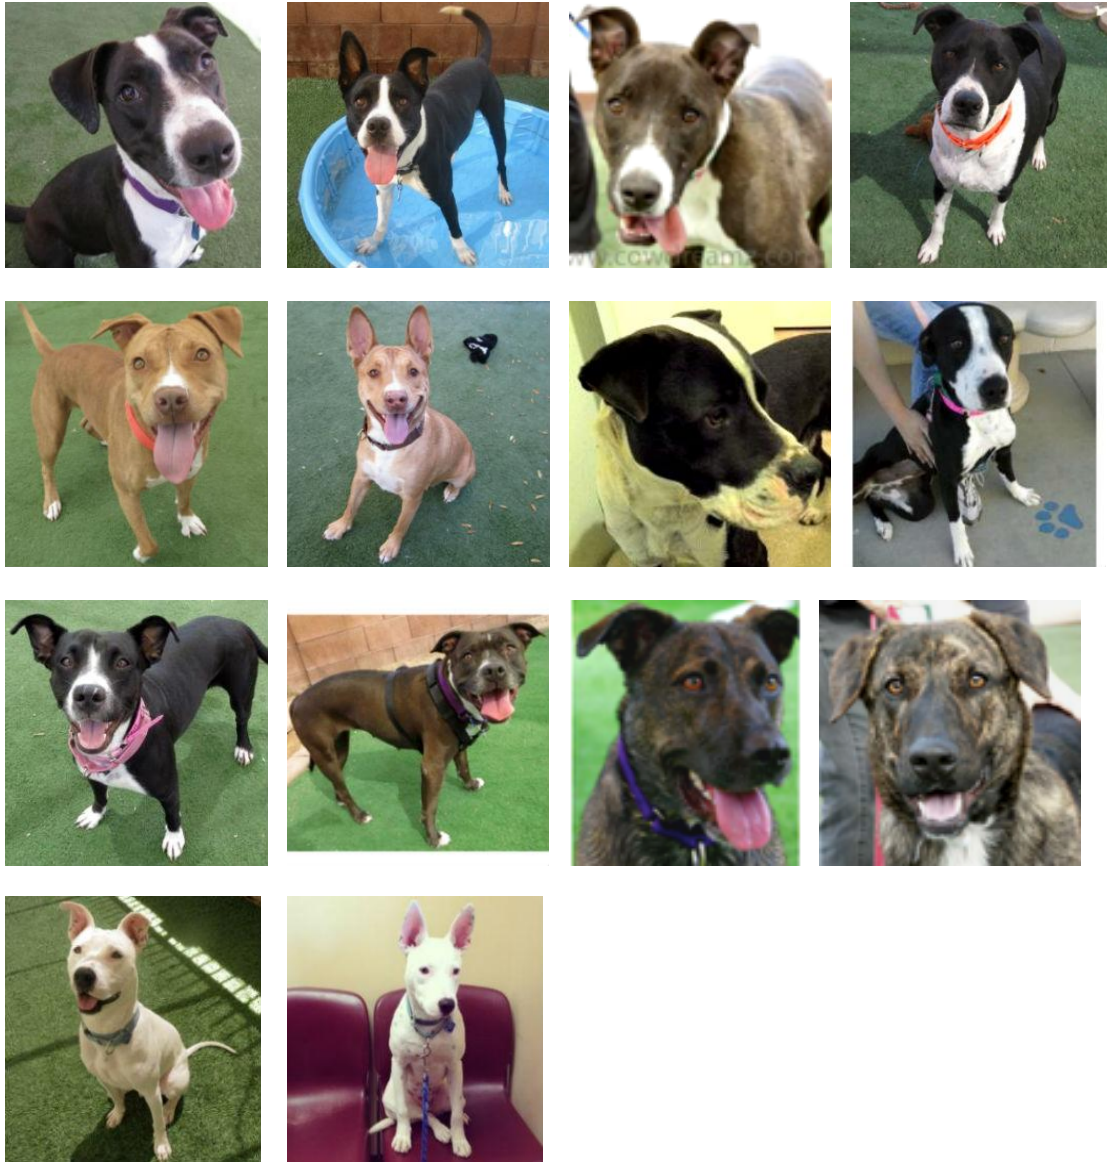

*S2 Appendix B.* Images used in Study 2. Images were randomized but are displayed here in matching pairs with dogs labeled as pit-bull-type breeds on the left and lookalike dogs of different breeds on the right.
